# Supplementary material for: The In Vitro Replication, Spread, and Oncolytic Potential of Finnish Circulating Strains of Herpes Simplex Virus Type 1
Source: MDPI journal article supplement (doi:10.3390/v14061290), 2022-06-13
Supplement: s1 [file s1]

**Table S1.** Examples of oncolytic HSVs in recent or current clinical trials. As of 8/3/2022. The table was compiled by a search in the ClinicalTrials.gov -database with the search term “HSV-1” and choosing the most recent clinical trial available for each vector.

| oHSV           |                                                        |                                                                                                                                            |                          |           | Example of a clinical study with the oHSV |                              |       |                    |                  |
|----------------|--------------------------------------------------------|--------------------------------------------------------------------------------------------------------------------------------------------|--------------------------|-----------|-------------------------------------------|------------------------------|-------|--------------------|------------------|
| Name           | Transgene                                              | Deletion                                                                                                                                   | Parental strain          | Reference | Target                                    | Combinatorial                | Phase | Status             | Trial identifier |
| T-VEC /Imlygic | GM-CSF                                                 | $\gamma$ 134.5 (ICP34.5), U <sub>s</sub> 12 (ICP47)                                                                                        | JS1 (clinical isolate)   | [1]       | Melanoma (stage III and IV)               | Checkpoint inhibitor (PD-1)  | II    | Recruiting         | NCT04330430      |
| M032           | IL-12                                                  | $\gamma$ 134.5 (ICP34.5)                                                                                                                   | F                        | [2]       | Glioblastoma, astrocytoma, gliosarcoma    | Checkpoint inhibitor (PD-1)  | I/II  | Not yet recruiting | NCT05084430      |
| G207           | LacZ                                                   | $\gamma$ 134.5 (U <sub>L</sub> 39 (ICP6) disabled)                                                                                         | F                        | [3]       | Pediatric brain tumors                    | Radiation                    | II    | Not yet recruiting | NCT04482933      |
| HSV1716        | None                                                   | $\gamma$ 134.5                                                                                                                             | 17+                      | [4]       | Mesothelioma                              | No                           | I/II  | Completed          | NCT01721018      |
| HF10 /C-REV    | None                                                   | UL56, LAT and $\gamma$ 34.5 (ICP34.5) (Loss of expression of U <sub>L</sub> 43, U <sub>L</sub> 49.5, U <sub>L</sub> 55, U <sub>L</sub> 56) | HF                       | [5]       | Melanoma                                  | Checkpoint inhibitor (CTLA4) | II    | Completed          | NCT03153085      |
| C134           | Human cytomegalovirus (HCMV) gene IRS1                 | $\gamma$ 134.5 (ICP34.5)                                                                                                                   | F                        | [6]       | Brain cancer                              | No                           | I     | Recruiting         | NCT03657576      |
| ONCR-177       | IL12, FLT3LG, CCL4, and antagonists to PD-1 and CTLA-4 | Tissue-specific miRNA mediated attenuation of U <sub>L</sub> 8, U <sub>L</sub> 54 (ICP27), ICP4, and the $\gamma$ 134.5 (ICP34.5) genes    | KOS                      | [7]       | Melanoma                                  | Checkpoint inhibitor (PD-1)  | I     | Recruiting         | NCT04348916      |
| OrienX010      | GM-CSF                                                 | $\gamma$ 134.5, U <sub>s</sub> 12 (ICP47), U <sub>L</sub> 39 (ICP6)                                                                        | CL1 (clinical isolate)   | [8]       | Melanoma                                  | Checkpoint inhibitor (PD-1)  | I     | Recruiting         | NCT04206358      |
| RP1            | GALV-GP R-, GM-CSF                                     | $\gamma$ 134.5 (ICP34.5), U <sub>s</sub> 12 (ICP47)                                                                                        | RH018 (clinical isolate) | [9]       | Melanoma                                  | Checkpoint inhibitor (PDL-1) | II    | Recruiting         | NCT03767348      |
| RP2            | GALV-GP R-, GM-CSF, anti-CTLA4                         |                                                                                                                                            |                          | [9]       | Cancer                                    | Checkpoint inhibitor (PDL-1) | I     | Recruiting         | NCT04336241      |
| RP3            | GALV-GP R-, anti-                                      |                                                                                                                                            |                          | [9]       | Advanced solid tumor                      | Checkpoint inhibitor (PD-1)  | I     | Recruiting         | NCT04735978      |

|              |                                                                                  |                                                                                                                                                        |     |      |                   |                      |      |                    |               |
|--------------|----------------------------------------------------------------------------------|--------------------------------------------------------------------------------------------------------------------------------------------------------|-----|------|-------------------|----------------------|------|--------------------|---------------|
|              | CTLA4, CD40L, 4-1BBL                                                             |                                                                                                                                                        |     |      |                   |                      |      |                    |               |
| rQNestin     | $\gamma$ 34.5 with a tumor-specific promoter                                     | $\gamma$ 34.5 (ICP34.5), U <sub>L</sub> 39 (ICP6)                                                                                                      | F   | [10] | Brain cancer      | Chemotherapy, biopsy | I    | Recruiting         | NCT03152318   |
| VG161        | IL-12, IL-15, IL-15RA and a PD-L1 blocker                                        | $\gamma$ 34.5 (ICP35.4)                                                                                                                                | 17+ | [11] | Liver cancer      | No                   | II   | Not yet recruiting | NCT05223816   |
| NV1020       | Fragment of HSV-2 DNA (including gD, gG, gI, gJ, portion of gE), p $\alpha$ 4-TK | One copy of $\gamma$ 34.5 (ICP34.5), $\alpha$ 4 (ICP4), and $\alpha$ 0 (ICP0), U <sub>L</sub> 56, (U <sub>L</sub> 24 disabled), U <sub>L</sub> 23 (TK) | F   | [12] | Colorectal cancer | No                   | I/II | Completed          | NCT00149396   |
| G47 $\Delta$ | LacZ                                                                             | $\gamma$ 34.5 (ICP34.5), disabled U <sub>L</sub> 39 (ICP6), U <sub>S</sub> 12 (ICP47)                                                                  | F   | [13] | Glioblastoma      | No                   | II   | Completed          | UMIN000015995 |

- [1] B. L. Liu *et al.*, "ICP34.5 deleted herpes simplex virus with enhanced oncolytic, immune stimulating, and anti-tumour properties," *Gene Ther.*, vol. 10, no. 4, pp. 292–303, 2003, doi: 10.1038/SJ.GT.3301885.
- [2] J. C. Roth *et al.*, "Evaluation of the Safety and Biodistribution of M032, an Attenuated Herpes Simplex Virus Type 1 Expressing hIL-12, After Intracerebral Administration to Aotus Nonhuman Primates," *Hum. Gene Ther. Clin. Dev.*, vol. 25, no. 1, p. 16, Mar. 2014, doi: 10.1089/HUMC.2013.201.
- [3] T. Mineta, S. D. Rabkin, T. Yazaki, W. D. Hunter, and R. L. Martuza, "Attenuated multi-mutated herpes simplex virus-1 for the treatment of malignant gliomas," *Nat. Med.*, vol. 1, no. 9, pp. 938–943, 1995, doi: 10.1038/NM0995-938.
- [4] A. MacLean, M. Ul-Fareed, L. Robertson, J. Harland, and S. Brown, "Herpes simplex virus type 1 deletion variants 1714 and 1716 pinpoint neurovirulence-related sequences in Glasgow strain 17+ between immediate early gene 1 and the 'a' sequence," *J. Gen. Virol.*, vol. 72 ( Pt 3), no. 3, pp. 631–639, 1991, doi: 10.1099/0022-1317-72-3-631.
- [5] I. R. Eissa *et al.*, "Genomic Signature of the Natural Oncolytic Herpes Simplex Virus HF10 and Its Therapeutic Role in Preclinical and Clinical Trials," *Front. Oncol.*, vol. 7, no. JUL, p. 149, Jul. 2017, doi: 10.3389/FONC.2017.00149.
- [6] K. A. Cassady, "Human Cytomegalovirus TRS1 and IRS1 Gene Products Block the Double-Stranded-RNA-Activated Host Protein Shutoff Response Induced by Herpes Simplex Virus Type 1 Infection," *J. Virol.*, vol. 79, no. 14, p. 8707, Jul. 2005, doi: 10.1128/JVI.79.14.8707-8715.2005.
- [7] B. B. Haines *et al.*, "ONCR-177, an Oncolytic HSV-1 Designed to Potently Activate Systemic Antitumor Immunity," *Cancer Immunol. Res.*, vol. 9, no. 3, pp. 291–308, Mar. 2021, doi: 10.1158/2326-6066.CIR-20-0609.
- [8] J. Ren *et al.*, "Adaptive T cell responses induced by oncolytic Herpes Simplex Virus-granulocyte macrophage-colony-stimulating factor therapy expanded by dendritic cell and cytokine-induced killer cell adoptive therapy," *Oncoimmunology*, vol. 6, no. 4, Apr. 2016, doi: 10.1080/2162402X.2016.1264563.
- [9] S. Thomas *et al.*, "Development of a new fusion-enhanced oncolytic immunotherapy platform based on herpes simplex virus type 1," *J. Immunother. Cancer*, vol. 7, no. 1, Aug. 2019, doi: 10.1186/S40425-019-0682-1.
- [10] H. Kambara, H. Okano, E. A. Chiocca, and Y. Saeki, "An Oncolytic HSV-1 Mutant Expressing ICP34.5 under Control of a Nestin Promoter Increases Survival of Animals even when Symptomatic from a Brain Tumor," *Cancer Res.*, vol. 65, no. 7, pp. 2832–2839, Apr. 2005, doi: 10.1158/0008-5472.CAN-04-3227.
- [11] D. V. Chouljenko *et al.*, "Induction of Durable Antitumor Response by a Novel Oncolytic Herpesvirus Expressing Multiple Immunomodulatory Transgenes," *Biomedicines*, vol. 8, no. 11, pp. 1–21, Nov. 2020, doi: 10.3390/BIOMEDICINES8110484.
- [12] K. J. Kelly, J. Wong, and Y. Fong, "Herpes simplex virus NV1020 as a novel and promising therapy for hepatic malignancy," *Expert Opin. Investig. Drugs*, vol. 17, no. 7, p. 1105, Jul. 2008, doi: 10.1517/13543784.17.7.1105.
- [13] T. Todo, R. L. Martuza, S. D. Rabkin, and P. A. Johnson, "Oncolytic herpes simplex virus vector with enhanced MHC class I presentation and tumor cell killing," *Proc. Natl. Acad. Sci. U. S. A.*, vol. 98, no. 11, pp. 6396–6401, May 2001, doi: 10.1073/PNAS.101136398/ASSET/4415FD06-4AC2-4099-97D2-B8A84F4AC423/ASSETS/GRAPHIC/PQ1011363006.JPEG.
