# Supplementary material for: The In Vitro Replication, Spread, and Oncolytic Potential of Finnish Circulating Strains of Herpes Simplex Virus Type 1
Source: Viruses. 2022 Jun 13;14(6):1290. doi: 10.3390/v14061290 (PMC9230972; doi:10.3390/v14061290)
Supplement: Supplementary file 1 [file viruses-14-01290-s001.zip]

Archive with 4 entries (4 files):
- File S1.txt
- File S2.txt
- Supplementary Figure S1.pdf
- Supplementary Table S1.pdf
