# Supplementary material for: The In Vitro Replication, Spread, and Oncolytic Potential of Finnish Circulating Strains of Herpes Simplex Virus Type 1
Source: Viruses. 2022 Jun 13;14(6):1290. doi: 10.3390/v14061290 (PMC9230972; doi:10.3390/v14061290)
Supplement: Supplementary file 1 [file viruses-14-01290-s001.zip › File S1.txt]

17+	---------------TGTTGCGCACGTACTTGGCCGTGGACCGACAGACCCCCTTGGCGTTGATCTTGTCGATCACCTCCTCGAAGGGGACGGGGGCGCGGTCCTCAAAGATCCCCATAAACTGGGAGTAGCGGTGGCCGAACCACACCTGCGAAACGGTGACGTCTTTGTAGTACATGGTGGCCTTGAACTTGTACGGGGCGATGTTCTCCTTGAAGACCACCGCGATGCCCTCCGTGTAGTTCTGACCCTCGGGCCGGGTCGGGCAGCGGCGCGGCTGCTCGAACTGCACCACCGTGGCGCCCGTGGGGGGTGGGCACACGTAAAAGTTTGCATCGGTGTTCTCCGCCTTGATGTCCCGCAGGTGCTCGCGCAGGGTGGCGTGGCCCGCGGCGACGG…
F	-------------------------------------------------------GGCGTTGATCTTGTCGATCACCTCCTCGAAGGGGACGGGGGCGCGGTCCTCAAAGATCCCCATAAACTGGGAGTAGCGGTGGCCGAACCACACCTGCGAAACGGTGACGTCTTTGTAGTACATGGTGGCCTTGAACTTGTACGGGGCGATGTTCTCCTTGAAGACCACCGCGATGCCCTCCGTGTAGTTCTGACCCTCGGGCCGGGTCGGGCAGCGGCGCGGCTGCTCGAACTGCACCACCGTGGCGCCCGTGGGGGGTGGGCACACGTAAAAGTTTGCATCGGTGTTCTCCGCCTTGATGTCCCGCAGGTGCTCGCGCAGGGTGGCGTGGCCCGCGGCGACGG…
H1052	------TCTCCAGGTTGTTGCGCACGTACTTGGCCGTGGACCGACAGACCCCCTTGGCGTTGATCTTGTCGATCACCTCCTCGAAGGGGACGGGGGCGCGGTCCTCAAAGATCCCCATAAACTGGGAGTAGCGGTGGCCGAACCACACCTGCGAAACGGTGACGTCTTTGTAGTACATGGTGGCCTTGAACTTGTACGGGGCGATGTTCTCCTTGAAGACCACCGCGATGCCCTCCGTGTAGTTCTGACCCTCGGGCCGGGTCGGGCAGCGGCGCGGCTGCTCGAACTGCACCACCGTGGCGCCCGTGGGGGGTGGGCACACGTAAAAGTTTGCATCGGTGTTCTCCGCCTTGATGTCCCGCAGGTGCTCGCGCAGGGTGGCGTGGCCCGCGGCGACGG…
KOS	-------------------------GTACTTGGCCGTGGACCGACAGACCCCCTTGGCGTTGATCTTGTCGATCACCTCCTCGAAGGGGACGGGGGCGCGGTCCTCAAAGATCCCCATAAACTGGGAGTAGCGGTGGCCGAACCACACCTGCGAAACGGTGACGTCTTTGTAGTACATGGTGGCCTTGAACTTGTACGGGGCGATGTTCTCCTTGAAGACCACCGCGATGCCCTCCGTGTAGTTCTGACCCTCGGGCCGGGTCGGGCAGCGGCGCGGCTGCTCGAACTGCACCACCGTGGCGCCCGTGGGGGGTGGGCACACGTAAAAGTTTGCATCGGTGTTCTCCGCCTTGATGTCCCGCAGGTGCTCGCGCAGGGTGGCGTGGCCCGCGGCGACGG…
V1	---------------TGTTGCGCACGTACTTGGCCGTGGACCGACAGACCCCCTTGGCGTTGATCTTGTCGATCACCTCCTCGAAGGGGACGGGGGCGCGGTCCTCAAAGATCCCCATAAACTGGGAGTAGCGGTGGCCGAACCACACCTGCGAAACGGTGACGTCTTTGTAGTACATGGTGGCCTTGAACTTGTACGGGGCGATGTTCTCCTTGAAGACCACCGCGATGCCCTCCGTGTAGTTCTGACCCTCGGGCCGGGTCGGGCAGCGGCGCGGCTGCTCGAACTGCACCACCGTGGCGCCCGTGGGGGGTGGGCACACGTAAAAGTTTGCATCGGTGTTCTCCGCCTTGATGTCCCGCAGGTGCTCGCGCAGGGTGGCGTGGCCCGCGGCGACGG…
V2	-----------------------------------------------------------TTGATCTTGTCGATCACCTCCTCGAAGGGGACGGGGGCGCGGTCCTCAAAGATCCCCATAAACTGGGAGTAGCGGTGGCCGAACCACACCTGCGAAACGGTGACGTCTTTGTAGTACATGGTGGCCTTGAACTTGTACGGGGCGATGTTCTCCTTGAAGACCACCGCGATGCCCTCCGTGTAGTTCTGACCCTCGGGCCGGGTCGAGCAGCGGCGCGGCTGCTCGAACTGCACCACCGTGGCGCCCGTGGGGGGTGGGCACACGTAAAAGTTTGCATCGGTGTTCTCCGCCTTGATGTCCCGCAGGTGCTCGCGCAGGGTGGCGTGGCCCGCGGCGACGG…
V3	--------TCCAGGTTGTTGCGCACGTACTTGGCCGTGGACCGACAGACCCCCTTGGCGTTGATCTTGTCGATCACCTCCTCGAAGGGGACGGGGGCGCGGTCCTCAAAGATCCCCATAAACTGGGAGTAGCGGTGGCCGAACCACACCTGCGAAACGGTGACGTCTTTGTAGTACATGGTGGCCTTGAACTTGTACGGGGCGATGTTCTCCTTGAAGACCACCGCGATGCCCTCCGTGTAGTTCTGACCCTCGGGCCGGGTCGGGCAGCGGCGCGGCTGCTCGAACTGCACCACCGTGGCGCCCGTGGGGGGTGGGCACACGTAAAAGTTTGCATCGGTGTTCTCCGCCTTGATGTCCCGCAGGTGCTCGCGCAGGGTGGCGTGGCCCGCGGCGACGG…
V4	---------CCAGGTTGTTGCGCACGTACTTGGCCGTGGACCGACAGACCCCCTTGGCGTTGATCTTGTCGATCACCTCCTCGAAGGGGACGGGGGCGCGGTCCTCAAAGATCCCCATAAACTGGGAGTAGCGGTGGCCGAACCACACCTGCGAAACGGTGACGTCTTTGTAGTACATGGTGGCCTTGAACTTGTACGGGGCGATGTTCTCCTTGAAGACCACCGCGATGCCCTCCGTGTAGTTCTGACCCTCGGGCCGGGTCGGGCAGCGGCGCGGCTGCTCGAACTGCACCACCGTGGCGCCCGTGGGGGGTGGGCACACGTAAAAGTTTGCATCGGTGTTCTCCGCCTTGATGTCCCGCAGGTGCTCGCGCAGGGTGGCGTGGCCCGCGGCGACGG…
V5	----------CAGGTTGTTGCGCACGTACTTGGCCGTGGACCGACAGACCCCCTTGGCGTTGATCTTGTCGATCACCTCCTCGAAGGGGACGGGGGCGCGGTCCTCAAAGATCCCCATAAACTGGGAGTAGCGGTGGCCGAACCACACCTGCGAAACGGTGACGTCTTTGTAGTACATGGTGGCCTTGAACTTGTACGGGGCGATGTTCTCCTTGAAGACCACCGCGATGCCCTCCGTGTAGTTCTGACCCTCGGGCCGGGTCGGGCAGCGGCGCGGCTGCTCGAACTGCACCACCGTGGCGCCCGTGGGGGGTGGGCACACGTAAAAGTTTGCATCGGTGTTCTCCGCCTTGATGTCCCGCAGGTGCTCGCGCAGGGTGGCGTGGCCCGCGGCGACGG…
V6	----------CAGGTTGTTGCGCACGTACTTGGCCGTGGACCGACAGACCCCCTTGGCGTTGATCTTGTCGATCACCTCCTCGAAGGGGACGGGGGCGCGGTCCTCAAAGATCCCCATAAACTGGGAGTAGCGGTGGCCGAACCACACCTGCGAAACGGTGACGTCTTTGTAGTACATGGTGGCCTTGAACTTGTACGGGGCGATGTTCTCCTTGAAGACCACCGCGATGCCCTCCGTGTAGTTCTGACCCTCGGGCCGGGTCGGGCAGCGGCGCGGCTGCTCGAACTGCACCACCGTGGCGCCCGTGGGGGGTGGGCACACGTAAAAGTTTGCATCGGTGTTCTCCGCCTTGATGTCCCGCAGGTGCTCGCGCAGGGTGGCGTGGCCCGCGGCGACGG…
V7	CGGTGGTCTCCAGGTTGTTGCGCACGTACTTGGCCGTGGACCGACAGACCCCCTTGGCGTTGATCTTGTCGATCACCTCCTCGAAGGGGACGGGGGCGCGGTCCTCAAAGATCCCCATAAACTGGGAGTAGCGGTGGCCGAACCACACCTGCGAAACGGTGACGTCTTTGTAGTACATGGTGGCCTTGAACTTGTACGGGGCGATGTTCTCCTTGAAGACCACCGCGATGCCCTCCGTGTAGTTCTGACCCTCGGGCCGGGTCGGGCAGCGGCGCGGCTGCTCGAACTGCACCACCGTGGCGCCCGTGGGGGGTGGGCACACGTAAAAGTTTGCATCGGTGTTCTCCGCCTTGATGTCCCGCAGGTGCTCGCGCAGGGTGGCGTGGCCCGCGGCGACGG…
V8	--------------------------------GCCGTGGACCGACAGACCCCCTTGGCGTTGATCTTGTCGATCACCTCCTCGAAGGGGACGGGGGCGCGGTCCTCAAAGATCCCCATAAACTGGGAGTAGCGGTGGCCGAACCACACCTGCGAAACGGTGACGTCTTTGTAGTACATGGTGGCCTTGAACTTGTACGGGGCGATGTTCTCCTTGAAGACCACCGCGATGCCCTCCGTGTAGTTCTGACCCTCGGGCCGGGTCGGGCAGCGGCGCGGCTGCTCGAACTGCACCACCGTGGCGCCCGTGGGGGGTGGGCACACGTAAAAGTTTGCATCGGTGTTCTCCGCCTTGATGTCCCGCAGGTGCTCGCGCAGGGTGGCGTGGCCCGCGGCGACGG…
V10	----------CAGGTTGTTGCGCACGTACTTGGCCGTGGACCGACAGACCCCCTTGGCGTTGATCTTGTCGATCACCTCCTCGAAGGGGACGGGGGCGCGGTCCTCAAAGATCCCCATAAACTGGGAGTAGCGGTGGCCGAACCACACCTGCGAAACGGTGACGTCTTTGTAGTACATGGTGGCCTTGAACTTGTACGGGGCGATGTTCTCCTTGAAGACCACCGCGATGCCCTCCGTGTAGTTCTGACCCTCGGGCCGGGTCGGACAGCGGCGCGGCTGCTCGAACTGCACCACCGTGGCGCCCGTGGGGGGTGGGCACACGTAAAAGTTTGCATCGGTGTTCTCCGCCTTGATGTCCCGCAGGTGCTCGCGCAGGGTGGCGTGGCCCGCGGCGACGG…
V11	---------CCAGGTTGTTGCGCACGTACTTGGCCGTGGACCGACAGACCCCCTTGGCGTTGATCTTGTCGATCACCTCCTCGAAGGGGACGGGGGCGCGGTCCTCAAAGATCCCCATAAACTGGGAGTAGCGGTGGCCGAACCACACCTGCGAAACGGTGACGTCTTTGTAGTACATGGTGGCCTTGAACTTGTACGGGGCGATGTTCTCCTTGAAGACCACCGCGATGCCCTCCGTGTAGTTCTGACCCTCGGGCCGGGTCGGGCAGCGGCGCGGCTGCTCGAACTGCACCACCGTGGCGCCCGTGGGGGGTGGGCACACGTAAAAGTTTGCATCGGTGTTCTCCGCCTTGATGTCCCGCAGGTGCTCGCGCAGGGTGGCGTGGCCCGCGGCGACGG…
V13	-------------GTTGTTGCGCACGTACTTGGCCGTGGACCGACAGACCCCCTTGGCGTTGATCTTGTCGATCACCTCCTCGAAGGGGACGGGGGCGCGGTCCTCAAAGATCCCCATAAACTGGGAGTAGCGGTGGCCGAACCACACCTGCGAAACGGTGACGTCTTTGTAGTACATGGTGGCCTTGAACTTGTACGGGGCGATGTTCTCCTTGAAGACCACCGCGATGCCCTCCGTGTAGTTCTGACCCTCGGGCCGGGTCGGGCAGCGGCGCGGCTGCTCGAACTGCACCACCGTGGCGCCCGTGGGGGGTGGGCACACGTAAAAGTTTGCATCGGTGTTCTCCGCCTTGATGTCCCGCAGGTGCTCGCGCAGGGTGGCGTGGCCCGCGGCGACGG…
V14	-------------GTTGTTGCGCACGTACTTGGCCGTGGACCGACAGACCCCCTTGGCGTTGATCTTGTCGATCACCTCCTCGAAGGGGACGGGGGCGCGGTCCTCAAAGATCCCCATAAACTGGGAGTAGCGGTGGCCGAACCACACCTGCGAAACGGTGACGTCTTTGTAGTACATGGTGGCCTTGAACTTGTACGGGGCGATGTTCTCCTTGAAGACCACCGCGATGCCCTCCGTGTAGTTCTGACCCTCGGGCCGGGTCGGGCAGCGGCGCGGCTGCTCGAACTGCACCACCGTGGCGCCCGTGGGGGGTGGGCACACGTAAAAGTTTGCATCGGTGTTCTCCGCCTTGATGTCCCGCAGGTGCTCGCGCAGGGTGGCGTGGCCCGCGGCGACGG…
V15	-------------------GCGCACGTACTTGGCCGTGGACCGACAGACCCCCTTGGCGTTGATCTTGTCGATCACCTCCTCGAAGGGGACGGGGGCGCGGTCCTCAAAGATCCCCATAAACTGGGAGTAGCGGTGGCCGAACCACACCTGCGAAACGGTGACGTCTTTGTAGTACATGGTGGCCTTGAACTTGTACGGGGCGATGTTCTCCTTGAAGACCACCGCGATGCCCTCCGTGTAGTTCTGACCCTCGGGCCGGGTCGGGCAGCGGCGCGGCTGCTCGAACTGCACCACCGTGGCGCCCGTGGGGGGTGGGCACACGTAAAAGTTTGCATCGGTGTTCTCCGCCTTGATGTCCCGCAGGTGCTCGCGCAGGGTGGCGTGGCCCGCGGCGACGG…
V16	-------------GTTGTTGCGCACGTACTTGGCCGTGGACCGACAGACCCCCTTGGCGTTGATCTTGTCGATCACCTCCTCGAAGGGGACGGGGGCGCGGTCCTCAAAGATCCCCATAAACTGGGAGTAGCGGTGGCCGAACCACACCTGCGAAACGGTGACGTCTTTGTAGTACATGGTGGCCTTGAACTTGTACGGGGCGATGTTCTCCTTGAAGACCACCGCGATGCCCTCCGTGTAGTTCTGACCCTCGGGCCGGGTCGGGCAGCGGCGCGGCTGCTCGAACTGCACCACCGTGGCGCCCGTGGGGGGTGGGCACACGTAAAAGTTTGCATCGGTGTTCTCCGCCTTGATGTCCCGCAGGTGCTCGCGCAGGGTGGCGTGGCCCGCGGCGACGG…
V17	---------------TGTTGCGCACGTACTTGGCCGTGGACCGACAGACCCCCTTGGCGTTGATCTTGTCGATCACCTCCTCGAAGGGGACGGGGGCGCGGTCCTCAAAGATCCCCATAAACTGGGAGTAGCGGTGGCCGAACCACACCTGCGAAACGGTGACGTCTTTGTAGTACATGGTGGCCTTGAACTTGTACGGGGCGATGTTCTCCTTGAAGACCACCGCGATGCCCTCCGTGTAGTTCTGACCCTCGGGCCGGGTCGGGCAGCGGCGCGGCTGCTCGAACTGCACCACCGTGGCGCCCGTGGGGGGTGGGCACACGTAAAAGTTTGCATCGGTGTTCTCCGCCTTGATGTCCCGCAGGTGCTCGCGCAGGGTGGCGTGGCCCGCGGCGACGG…
v18	-------------------------GTACTTGGCCGTGGACCGACAGACCCCCTTGGCGTTGATCTTGTCGATCACCTCCTCGAAGGGGACGGGGGCGCGGTCCTCAAAGATCCCCATAAACTGGGAGTAGCGGTGGCCGAACCACACCTGCGAAACGGTGACGTCTTTGTAGTACATGGTGGCCTTGAACTTGTACGGGGCGATGTTCTCCTTGAAGACCACCGCGATGCCCTCCGTGTAGTTCTGACCCTCGGGCCGGGTCGGGCAGCGGCGCGGCTGCTCGAACTGCACCACCGTGGCGCCCGTGGGGGGTGGGCACACGTAAAAGTTTGCATCGGTGTTCTCCGCCTTGATGTCCCGCAGGTGCTCGCGCAGGGTGGCGTGGCCCGCGGCGACGG…
V19	-------------------------GTACTTGGCCGTGGACCGACAGACCCCCTTGGCGTTGATCTTGTCGATCACCTCCTCGAAGGGGACGGGGGCGCGGTCCTCAAAGATCCCCATAAACTGGGAGTAGCGGTGGCCGAACCACACCTGCGAAACGGTGACGTCTTTGTAGTACATGGTGGCCTTGAACTTGTACGGGGCGATGTTCTCCTTGAAGACCACCGCGATGCCCTCCGTGTAGTTCTGACCCTCGGGCCGGGTCGGGCAGCGGCGCGGCTGCTCGAACTGCACCACCGTGGCGCCCGTGGGGGGTGGGCACACGTAAAAGTTTGCATCGGTGTTCTCCGCCTTGATGTCCCGCAGGTGCTCGCGCAGGGTGGCGTGGCCCGCGGCGACGG…
V20	-------------GTTGTTGCGCACGTACTTGGCCGTGGACCGACAGACCCCCTTGGCGTTGATCTTGTCGATCACCTCCTCGAAGGGGACGGGGGCGCGGTCCTCAAAGATCCCCATAAACTGGGAGTAGCGGTGGCCGAACCACACCTGCGAAACGGTGACGTCTTTGTAGTACATGGTGGCCTTGAACTTGTACGGGGCGATGTTCTCCTTGAAGACCACCGCGATGCCCTCCGTGTAGTTCTGACCCTCGGGCCGGGTCGGGCAGCGGCGCGGCTGCTCGAACTGCACCACCGTGGCGCCCGTGGGGGGTGGGCACACGTAAAAGTTTGCATCGGTGTTCTCCGCCTTGATGTCCCGCAGGTGCTCGCGCAGGGTGGCGTGGCCCGCGGCGACGG…
V21	-------------------------GTACTTGGCCGTGGACCGACAGACCCCCTTGGCGTTGATCTTGTCGATCACCTCCTCGAAGGGGACGGGGGCGCGGTCCTCAAAGATCCCCATAAACTGGGAGTAGCGGTGGCCGAACCACACCTGCGAAACGGTGACGTCTTTGTAGTACATGGTGGCCTTGAACTTGTACGGGGCGATGTTCTCCTTGAAGACCACCGCGATGCCCTCCGTGTAGTTCTGACCCTCGGGCCGGGTCGGGCAGCGGCGCGGCTGCTCGAACTGCACCACCGTGGCGCCCGTGGGGGGTGGGCACACGTAAAAGTTTGCATCGGTGTTCTCCGCCTTGATGTCCCGCAGGTGCTCGCGCAGGGTGGCGTGGCCCGCGGCGACGG…
V22	-------------GTTGTTGCGCACGTACTTGGCCGTGGACCGACAGACCCCCTTGGCGTTGATCTTGTCGATCACCTCCTCGAAGGGGACGGGGGCGCGGTCCTCAAAGATCCCCATAAACTGGGAGTAGCGGTGGCCGAACCACACCTGCGAAACGGTGACGTCTTTGTAGTACATGGTGGCCTTGAACTTGTACGGGGCGATGTTCTCCTTGAAGACCACCGCGATGCCCTCCGTGTAGTTCTGACCCTCGGGCCGGGTCGGGCAGCGGCGCGGCTGCTCGAACTGCACCACCGTGGCGCCCGTGGGGGGTGGGCACACGTAAAAGTTTGCATCGGTGTTCTCCGCCTTGATGTCCCGCAGGTGCTCGCGCAGGGTGGCGTGGCCCGCGGCGACGG…
V23	-------------------------GTACTTGGCCGTGGACCGACAGACCCCCTTGGCGTTGATCTTGTCGATCACCTCCTCGAAGGGGACGGGGGCGCGGTCCTCAAAGATCCCCATAAACTGGGAGTAGCGGTGGCCGAACCACACCTGCGAAACGGTGACGTCTTTGTAGTACATGGTGGCCTTGAACTTGTACGGGGCGATGTTCTCCTTGAAGACCACCGCGATGCCCTCCGTGTAGTTCTGACCCTCGGGCCGGGTCGGGCAGCGGCGCGGCTGCTCGAACTGCACCACCGTGGCGCCCGTGGGGGGTGGGCACACGTAAAAGTTTGCATCGGTGTTCTCCGCCTTGATGTCCCGCAGGTGCTCGCGCAGGGTGGCGTGGCCCGCGGCGACGG…
V24	-------------------------GTACTTGGCCGTGGACCGACAGACCCCCTTGGCGTTGATCTTGTCGATCACCTCCTCGAAGGGGACGGGGGCGCGGTCCTCAAAGATCCCCATAAACTGGGAGTAGCGGTGGCCGAACCACACCTGCGAAACGGTGACGTCTTTGTAGTACATGGTGGCCTTGAACTTGTACGGGGCGATGTTCTCCTTGAAGACCACCGCGATGCCCTCCGTGTAGTTCTGACCCTCGGGCCGGGTCGGGCAGCGGCGCGGCTGCTCGAACTGCACCACCGTGGCGCCCGTGGGGGGTGGGCACACGTAAAAGTTTGCATCGGTGTTCTCCGCCTTGATGTCCCGCAGGTGCTCGCGCAGGGTGGCGTGGCCCGCGGCGACGG…
V25	--------TCCAGGTTGTTGCGCACGTACTTGGCCGTGGACCGACAGACCCC-TTGGCGTTGATCTTGTCGATCACCTCCTCGAAGGGGACGGGGGCGCGGTCCTCAAAGATCCCCATAAACTGGGAGTAGCGGTGGCCGAACCACACCTGCGAAACGGTGACGTCTTTGTAGTACATGGTGGCCTTGAACTTGTACGGGGCGATGTTCTCCTTGAAGACCACCGCGATGCCCTCCGTGTAGTTCTGACCCTCGGGCCGGGTCGGGCAGCGGCGCGGCTGCTCGAACTGCACCACCGTGGCGCCCGTGGGGGGTGGGCACACGTAAAAGTTTGCATCGGTGTTCTCCGCCTTGATGTCCCGCAGGTGCTCGCGCAGGGTGGCGTGGCCCGCGGCGACGG…
V26	--------------------------TACTTGGCCGTGGACCGACAGACCCCCTTGGCGTTGATCTTGTCGATCACCTCCTCGAAGGGGACGGGGGCGCGGTCCTCAAAGATCCCCATAAACTGGGAGTAGCGGTGGCCGAACCACACCTGCGAAACGGTGACGTCTTTGTAGTACATGGTGGCCTTGAACTTGTACGGGGCGATGTTCTCCTTGAAGACCACCGCGATGCCCTCCGTGTAGTTCTGACCCTCGGGCCGGGTCGGGCAGCGGCGCGGCTGCTCGAACTGCACCACCGTGGCGCCCGTGGGGGGTGGGCACACGTAAAAGTTTGCATCGGTGTTCTCCGCCTTGATGTCCCGCAGGTGCTCGCGCAGGGTGGCGTGGCCCGCGGCGACGG…
V27	--------TCCAGGTTGTTGCGCACGTACTTGGCCGTGGACCGACAGACCCCCTTGGCGTTGATCTTGTCGATCACCTCCTCGAAGGGGACGGGGGCGCGGTCCTCAAAGATCCCCATAAACTGGGAGTAGCGGTGGCCGAACCACACCTGCGAAACGGTGACGTCTTTGTAGTACATGGTGGCCTTGAACTTGTACGGGGCGATGTTCTCCTTGAAGACCACCGCGATGCCCTCCGTGTAGTTCTGACCCTCGGGCCGGGTCGGGCAGCGGCGCGGCTGCTCGAACTGCACCACCGTGGCGCCCGTGGGGGGTGGGCACACGTAAAAGTTTGCATCGGTGTTCTCCGCCTTGATGTCCCGCAGGTGCTCGCGCAGGGTGGCGTGGCCCGCGGCGACGG…
V28	-------------------------GTACTTGGCCGTGGACCGACAGACCCCCTTGGCGTTGATCTTGTCGATCACCTCCTCGAAGGGGACGGGGGCGCGGTCCTCAAAGATCCCCATAAACTGGGAGTAGCGGTGGCCGAACCACACCTGCGAAACGGTGACGTCTTTGTAGTACATGGTGGCCTTGAACTTGTACGGGGCGATGTTCTCCTTGAAGACCACCGCGATGCCCTCCGTGTAGTTCTGACCCTCGGGCCGGGTCGGGCAGCGGCGCGGCTGCTCGAACTGCACCACCGTGGCGCCCGTGGGGGGTGGGCACACGTAAAAGTTTGCATCGGTGTTCTCCGCCTTGATGTCCCGCAGGTGCTCGCGCAGGGTGGCGTGGCCCGCGGCGACGG…
V29	------------GGTTGTTGCGCACGTACTTGGCCGTGGACCGACAGACCCCCTTGGCGTTGATCTTGTCGATCACCTCCTCGAAGGGGACGGGGGCGCGGTCCTCAAAGATCCCCATAAACTGGGAGTAGCGGTGGCCGAACCACACCTGCGAAACGGTGACGTCTTTGTAGTACATGGTGGCCTTGAACTTGTACGGGGCGATGTTCTCCTTGAAGACCACCGCGATGCCCTCCGTGTAGTTCTGACCCTCGGGCCGGGTCGGGCAGCGGCGCGGCTGCTCGAACTGCACCACCGTGGCGCCCGTGGGGGGTGGGCACACGTAAAAGTTTGCATCGGTGTTCTCCGCCTTGATGTCCCGCAGGTGCTCGCGCAGGGTGGCGTGGCCCGCGGCGACGG…
V30	-------------------------GTACTTGGCCGTGGACCGACAGACCCCCTTGGCGTTGATCTTGTCGATCACCTCCTCGAAGGGGACGGGGGCGCGGTCCTCAAAGATCCCCATAAACTGGGAGTAGCGGTGGCCGAACCACACCTGCGAAACGGTGACGTCTTTGTAGTACATGGTGGCCTTGAACTTGTACGGGGCGATGTTCTCCTTGAAGACCACCGCGATGCCCTCCGTGTAGTTCTGACCCTCGGGCCGGGTCGGGCAGCGGCGCGGCTGCTCGAACTGCACCACCGTGGCGCCCGTGGGGGGTGGGCACACGTAAAAGTTTGCATCGGTGTTCTCCGCCTTGATGTCCCGCAGGTGCTCGCGCAGGGTGGCGTGGCCCGCGGCGACGG…
V31	-------------------------------------------------------GGCGTTGATCTTGTCGATCACCTCCTCGAAGGGGACGGGGGCGCGGTCCTCAAAGATCCCCATAAACTGGGAGTAGCGGTGGCCGAACCACACCTGCGAAACGGTGACGTCTTTGTAGTACATGGTGGCCTTGAACTTGTACGGGGCGATGTTCTCCTTGAAGACCACCGCGATGCCCTCCGTGTAGTTCTGACCCTCGGGCCGGGTCGGGCAGCGGCGCGGCTGCTCGAACTGCACCACCGTGGCGCCCGTGGGGGGTGGGCACACGTAAAAGTTTGCATCGGTGTTCTCCGCCTTGATGTCCCGCAGGTGCTCGCGCAGGGTGGCGTGGCCCGCGGCGACGG…
V32	-------------------------GTACTTGGCCGTGGACCGACAGACCCCCTTGGCGTTGATCTTGTCGATCACCTCCTCGAAGGGGACGGGGGCGCGGTCCTCAAAGATCCCCATAAACTGGGAGTAGCGGTGGCCGAACCACACCTGCGAAACGGTGACGTCTTTGTAGTACATGGTGGCCTTGAACTTGTACGGGGCGATGTTCTCCTTGAAGACCACCGCGATGCCCTCCGTGTAGTTCTGACCCTCGGGCCGGGTCGGGCAGCGGCGCGGCTGCTCGAACTGCACCACCGTGGCGCCCGTGGGGGGTGGGCACACGTAAAAGTTTGCATCGGTGTTCTCCGCCTTGATGTCCCGCAGGTGCTCGCGCAGGGTGGCGTGGCCCGCGGCGACGG…
V33	---------------TGTTGCGCACGTACTTGGCCGTGGACCGACAGACCCCCTTGGCGTTGATCTTGTCGATCACCTCCTCGAAGGGGACGGGGGCGCGGTCCTCAAAGATCCCCATAAACTGGGAGTAGCGGTGGCCGAACCACACCTGCGAAACGGTGACGTCTTTGTAGTACATGGTGGCCTTGAACTTGTACGGGGCGATGTTCTCCTTGAAGACCACCGCGATGCCCTCCGTGTAGTTCTGACCCTCGGGCCGGGTCGGGCAGCGGCGCGGCTGCTCGAACTGCACCACCGTGGCGCCCGTGGGGGGTGGGCACACGTAAAAGTTTGCATCGGTGTTCTCCGCCTTGATGTCCCGCAGGTGCTCGCGCAGGGTGGCGTGGCCCGCGGCGACGG…
V34	-------------------------GTACTTGGCCGTGGACCGACAGACCCCCTTGGCGTTGATCTTGTCGATCACCTCCTCGAAGGGGACGGGGGCGCGGTCCTCAAAGATCCCCATAAACTGGGAGTAGCGGTGGCCGAACCACACCTGCGAAACGGTGACGTCTTTGTAGTACATGGTGGCCTTGAACTTGTACGGGGCGATGTTCTCCTTGAAGACCACCGCGATGCCCTCCGTGTAGTTCTGACCCTCGGGCCGGGTCGGGCAGCGGCGCGGCTGCTCGAACTGCACCACCGTGGCGCCCGTGGGGGGTGGGCACACGTAAAAGTTTGCATCGGTGTTCTCAGCCTTGATGTCCCGCAGGTGCTCGCGCAGGGTGGCGTGGCCCGCGGCGACGG…
V35	-------------------------GTACTTGGCCGTGGACCGACAGACCCCCTTGGCGTTGATCTTGTCGATCACCTCCTCGAAGGGGACGGGGGCGCGGTCCTCAAAGATCCCCATAAACTGGGAGTAGCGGTGGCCGAACCACACCTGCGAAACGGTGACGTCTTTGTAGTACATGGTGGCCTTGAACTTGTACGGGGCGATGTTCTCCTTGAAGACCACCGCGATGCCCTCCGTGTAGTTCTGACCCTCGGGCCGGGTCGGGCAGCGGCGCGGCTGCTCGAACTGCACCACCGTGGCGCCCGTGGGGGGTGGGCACACGTAAAAGTTTGCATCGGTGTTCTCCGCCTTGATGTCCCGCAGGTGCTCGCGCAGGGTGGCGTGGCCCGCGGCGACGG…
V36	--------TCCAGGTTGTTGCGCACGTACTTGGCCGTGGACCGACAGACCCCCTTGGCGTTGATCTTGTCGATCACCTCCTCGAAGGGGACGGGGGCGCGGTCCTCAAAGATCCCCATAAACTGGGAGTAGCGGTGGCCGAACCACACCTGCGAAACGGTGACGTCTTTGTAGTACATGGTGGCCTTGAACTTGTACGGGGCGATGTTCTCCTTGAAGACCACCGCGATGCCCTCCGTGTAGTTCTGACCCTCGGGCCGGGTCGGGCAGCGGCGCGGCTGCTCGAACTGCACCACCGTGGCGCCCGTGGGGGGTGGGCACACGTAAAAGTTTGCATCGGTGTTCTCCGCCTTGATGTCCCGCAGGTGCTCGCGCAGGGTGGCGTGGCCCGCGGCGACGG…
V9	---------CCAGGTTGTTGCGCACGTACTTGGCCGTGGACCGACAGACCCCCTTGGCGTTGATCTTGTCGATCACCTCCTCGAAGGGGACGGGGGCGCGGTCCTCAAAGATCCCCATAAACTGGGAGTAGCGGTGGCCGAACCACACCTGCGAAACGGTGACGTCTTTGTAGTACATGGTGGCCTTGAACTTGTACGGGGCGATGTTCTCCTTGAAGACCACCGCGATGCCCTCCGTGTAGTTCTGACCCTCGGGCCGGGTCGGGCAGCGGCGCGGCTGCTCGAACTGCACCACCGTGGCGCCCGTGGGGGGTGGGCACACGTAAAAGTTTGCATCGGTGTTCTCCGCCTTGATGTCCCGCAGGTGCTCGCGCAGGGTGGCGTGGCCCGCGGCGACGG…
V12	----------------------------------------CCGACAGACCCCCTTGGCGTTGATCTTGTCGATCACCTCCTCGAAGGGGACGGGGGCGCGGTCCTCAAAGATCCCCATAAACTGGGAGTAGCGGTGGCCGAACCACACCTGCGAAACGGTGACGTCTTTGTAGTACATGGTGGCCTTGAACTTGTACGGGGCGATGTTCTCCTTGAAGACCACCGCGATGCCCTCCGTGTAGTTCTGACCCTCGGGCCGGGTCGGGCAGCGGTGCGGCTGCTCGAACTGCACCACCGTGGCGCCCGTGGGGGGTGGGCACACGTAAAAGTTTGCATCGGTGTTCTCCGCCTTGATGTCCCGCAGGTGCTCGCGCAGGGTGGCGTGGCCCGCGGCGACGG…
H12114	CGGTGGTCTCAAGGTTGTTACGCACGTACTTGGCCGTGGACCGACAGACCCCCTTGGCGTTGATCTTGTCGATCACCTCCTCGAAGGGGACGGGGGCGCGGTCCTCAAAGATCCCCATAAACTGGGAGTAGCGGTGGCCGAACCACACCTGCGAAACGGTGACGTCTTTGTAGTACATGGTGGCCTTGAACTTGTACGGGGCGATGTTCTCCTTGAAGACCACCGCGATGCCCTCCGTGTAGTTCTGACCCTCGGGCCGGGTCGGGCAGCGGCGCGGCTGCTCGAACTGCACCACCGTGGCGCCCGTGGGGGGTGGGCACACGTAAAAGTTTGCATCGGTGTTCTCCGCCTTGATGTCCCGCAGGTGCTCGCGCAGGGTGGCGTGGCCCGCGGCGACGG…
H12117	CGGTGGTCTCCAGGTTGTTGCGCACGTACTTGGCCGTGGACCGACAGACCCCCTTGGCGTTGATCTTGTCGATCACCTCCTCGAAGGGGACGGGGGCGCGGTCCTCAAAGATCCCCATAAACTGGGAGTAGCGGTGGCCGAACCACACCTGCGAAACGGTGACGTCTTTGTAGTACATGGTGGCCTTGAACTTGTACGGGGCGATGTTCTCCTTGAAGACCACCGCGATGCCCTCCGTGTAGTTCTGACCCTCGGGCCGGGTCGGGCAGCGGCGCGGCTGCTCGAACTGCACCACCGTGGCGCCCGTGGGGGGTGGGCACACGTAAAAGTTTGCATCGGTGTTCTCCGCCTTGATGTCCCGCAGGTGCTCGCGCAGGGTGGCGTGGCCCGCGGCGACGG…
H12118	CGGTGGTCTCCAGGTTGTTGCGCACGTACTTGGCCGTGGACCGACAGACCCCCTTGGCGTTGATCTTGTCGATCACCTCCTCGAAGGGGACGGGGGCGCGGTCCTCAAAGATCCCCATAAACTGGGAGTAGCGGTGGCCGAACCACACCTGCGAAACGGTGACGTCTTTGTAGTACATGGTGGCCTTGAACTTGTACGGGGCGATGTTCTCCTTGAAGACCACCGCGATGCCCTCCGTGTAGTTCTGACCCTCGGGCCGGGTCGGACAGCGGCGCGGCTGCTCGAACTGCACCACCGTGGCGCCCGTGGGGGGTGGGCACACGTAAAAGTTTGCATCGGTGTTCTCCGCCTTGATGTCCCGCAGGTGCTCGCGCAGGGTGGCGTGGCCCGCGGCGACGG…
H15119	CGGTGGTCTCCAGGTTGTTGCGCACGTACTTGGCCGTGGACCGACAGACCCCCTTGGCGTTGATCTTGTCGATCACCTCCTCGAAGGGGACGGGGGCGCGGTCCTCAAAGATCCCCATAAACTGGGAGTAGCGGTGGCCGAACCACACCTGCGAAACGGTGACGTCTTTGTAGTACATGGTGGCCTTGAACTTGTACGGGGCGATGTTCTCCTTGAAGACCACCGCGATGCCCTCCGTGTAGTTCTGACCCTCGGGCCGGGTCGGGCAGCGGCGCGGCTGCTCGAACTGCACCACCGTGGCGCCCGTGGGGGGTGGGCACACGTAAAAGTTTGCATCGGTGTTCTCCGCCTTGATGTCCCGCAGGTGCTCGCGCAGGGTGGCGTGGCCCGCGGCGACGG…
H1215	CGGTGGTCTCCAGGTTGTTGCGCACGTACTTGGCCGTGGACCGACAGACCCCCTTGGCGTTGATCTTGTCGATCACCTCCTCGAAGGGGACGGGGGCGCGGTCCTCAAAGATCCCCATAAACTGGGAGTAGCGGTGGCCGAACCACACCTGCGAAACGGTGACGTCTTTGTAGTACATGGTGGCCTTGAACTTGTACGGGGCGATGTTCTCCTTGAAGACCACCGCGATGCCCTCCGTGTAGTTCTGACCCTCGGGCCGGGTCGGGCAGCGGCGCGGCTGCTCGAACTGCACCACCGTGGCGCCCGTGGGGGGTGGGCACACGTAAAAGTTTGCATCGGTGTTCTCCGCCTTGATGTCCCGCAGGTGCTCGCGCAGGGTGGCGTGGCCCGCGGCGACGG…
H1311	CGGTGGTCTCCAGGTTGTTGCGCACGTACTTGGCCGTGGACCGACAGACCCCCTTGGCGTTGATCTTGTCGATCACCTCCTCGAAGGGGACGGGGGCGCGGTCCTCAAAGATCCCCATAAACTGGGAGTAGCGGTGGCCGAACCACACCTGCGAAACGGTGACGTCTTTGTAGTACATGGTGGCCTTGAACTTGTACGGGGCGATGTTCTCCTTGAAGACCACCGCGATGCCCTCCGTGTAGTTCTGACCCTCGGGCCGGGTCGGGCAGCGGCGCGGCTGCTCGAACTGCACCACCGTGGCGCCCGTGGGGGGTGGGCACACGTAAAAGTTTGCATCGGTGTTCTCCGCCTTGATGTCCCGCAGGTGCTCGCGCAGGGTGGCGTGGCCCGCGGCGACGG…
H1312	CGGTGGTCTCCAGGTTGTTGCGCACGTACTTGGCCGTGGACCGACAGACCCCCTTGGCGTTGATCTTGTCGATCACCTCCTCGAAGGGGACGGGGGCGCGGTCCTCAAAGATCCCCATAAACTGGGAGTAGCGGTGGCCGAACCACACCTGCGAAACGGTGACGTCTTTGTAGTACATGGTGGCCTTGAACTTGTACGGGGCGATGTTCTCCTTGAAGACCACCGCGATGCCCTCCGTGTAGTTCTGACCCTCGGGCCGGGTCGGGCAGCGGCGCGGCTGCTCGAACTGCACCACCGTGGCGCCCGTGGGGGGTGGGCACACGTAAAAGTTTGCATCGGTGTTCTCCGCCTTGATGTCCCGCAGGTGCTCGCGCAGGGTGGCGTGGCCCGCGGCGACGG…
H1412	CGGTGGTCTCCAGGTTGTTGCGCACGTACTTGGCCGTGGACCGACAGACCCCCTTGGCGTTGATCTTGTCGATCACCTCCTCGAAGGGGACGGGGGCGCGGTCCTCAAAGATCCCCATAAACTGGGAGTAGCGGTGGCCGAACCACACCTGCGAAACGGTGACGTCTTTGTAGTACATGGTGGCCTTGAACTTGTACGGGGCGATGTTCTCCTTGAAGACCACCGCGATGCCCTCCGTGTAGTTCTGACCCTCGGGCCGGGTCGGGCAGCGGCGCGGCTGCTCGAACTGCACCACCGTGGCGCCCGTGGGGGGTGGGCACACGTAAAAGTTTGCATCGGTGTTCTCCGCCTTGATGTCCCGCAGGTGCTCGCGCAGGGTGGCGTGGCCCGCGGCGACGG…
H12113	CGGTGGTCTCCAGGTTGTTGCGCACGTACTTGGCCGTGGACCGACAGACCCCCTTGGCGTTGATCTTGTCGATCACCTCCTCGAAGGGGACGGGGGCGCGGTCCTCAAAGATCCCCATAAACTGGGAGTAGCGGTGGCCGAACCACACCTGCGAAACGGTGACGTCTTTGTAGTACATGGTGGCCTTGAACTTGTACGGGGCGATGTTCTCCTTGAAGACCACCGCGATGCCCTCCGTGTAGTTCTGACCCTCGGGCCGGGTCGGGCAGCGGCGCGGCTGCTCGAACTGCACCACCGTGGCGCCCGTGGGGGGTGGGCACACGTAAAAGTTTGCATCGGTGTTCTCCGCCTTGATGTCCCGCAGGTGCTCGCGCAGGGTGGCGTGGCCCGCGGCGACGG…
H1211	CGGTGGTCTCCAGGTTGTTGCGCACGTACTTGGCCGTGGACCGACAGACCCCCTTGGCGTTGATCTTGTCGATCACCTCCTCGAAGGGGACGGGGGCGCGGTCCTCAAAGATCCCCATAAACTGGGAGTAGCGGTGGCCGAACCACACCTGCGAAACGGTGACGTCTTTGTAGTACATGGTGGCCTTGAACTTGTACGGGGCGATGTTCTCCTTGAAGACCACCGCGATGCCCTCCGTGTAGTTCTGACCCTCGGGCCGGGTCGGGCAGCGGCGCGGCTGCTCGAACTGCACCACCGTGGCGCCCGTGGGGGGTGGGCACACGTAAAAGTTTGCATCGGTGTTCTCCGCCTTGATGTCCCGCAGGTGCTCGCGCAGGGTGGCGTGGCCCGCGGCGACGG…
