# Supplementary material for: The In Vitro Replication, Spread, and Oncolytic Potential of Finnish Circulating Strains of Herpes Simplex Virus Type 1
Source: Viruses. 2022 Jun 13;14(6):1290. doi: 10.3390/v14061290 (PMC9230972; doi:10.3390/v14061290)
Supplement: Supplementary file 1 [file viruses-14-01290-s001.zip › File S2.txt]

17+	---------------------------------------GCCTGTTTGTCCTGGGGATGGCCATAGCCGCCGAAGGGACTCTGGCGTACAACGGCTCGGCCTATGGCTCCTGCGACCCGAAACTGCTTCCGTCTTCGGCCCCGCGTCTGGCCCCGGCGAGCGTATACCAACCCGCCCCTAACCAGGCCTCCACCCCCTCGACCACCACCTCCACCCCCTCGACCACCATCCCCGCTCCCTCGACCACCATCCCCGCTCCCC------------------------------------------AAGCATCGACCACGCCCTTCCCCACGGGAGATCCAAAACCACAACCTCCCGGGGTCAACCACGAACCCCCATCTAATGCCACGCGAGCGACCCGCG…
F	--------------------------------------------------------ATGGCCATAGCCGCCGAAGGGACTCTGGCGTACAACGGCTCGGCCCATGGCTCCTGCGACCCGAAACTGCTTCCGTATTCGGCCCCGCGTCTGGCCCCGGCGAGCGTATACCAACCCGCCCCTAACCCGGCCTCCACCCCCTCGACCACCACCTCCACCCCCTCGACCACCACCTCCACCCCCTCGACCACCA------------------------------------------TCCCCGCTCCCCAAGCATCGACCACACCCTTCCCCACGGGAGACCCAAAACCCCAACCTCACGGGGTCAACCACGAACCCCCATCGAATGCCACGCGAGCGACCCGCG…
H1052	---------------------------------------GCCTGTTTGTCCTGGGGATGGCCATAGCCGCCGAAGGGACTCTGGCGTACAACGGCTCGGCCTATGGCTCCTGCGACCCGAAACTGCTTCCGTCTTCGGCCCCGCGTCTGGCCCCGGCGAGCGTATACCAACCCGCCCCTAACCAGGCCTCCACCCCCTCGACCACCACCTCCACCCCCTCGACCACCATCCCCGCTCCCTCGACCACCATCCCCGCTCCCC------------------------------------------AAGCATCGACCACGCCCTTCCCCACGGGAGATCCAAAACCACAACCTCCCGGGGTCAACCACGAACCCCCATCTAATGCCATGCGAGCGACCCGCG…
KOS	--------------------------------------------------------ATGGCCATAGCCGCCGAAGGTACTCTGGCGTACAACGGCTCGGCCCATGGCTCCTGCGACCCGAAACTGCTTCCGTCTTCGGCCCCGCGTCTGGCCCCGGCGAGCGTATACCAACCCGCCCCTAACCCGGCCTCCACCCCCTCGACCACCACCTCCACCCCCTCGACCACCA---------------------TCCCCGCTCCCC------------------------------------------AAGCATCGACCACACCCTTCCCCACGGGAGACCCAAAACCCCAACCTCACGGGGTCAACCACGAACCCCCATCGAATGCCACGCGAGCGACCCGCG…
V2	--------------------------------------------------CTGGGGATGGCCATAGCCGCCGAAGGTACTCTGGCGTACAACGGCTCGGCCCATGGCTCCTGCGACCCGAAACTGCTTCCGTCTTCGGCCCCGCGTCTGGCCCCGGCGAGCGTATACCAACCCGCCCCTAACCCGGCCTCCACCCCCTCGACCACCACCTCCACCCCCTCGACCACCACCTCCACCCCCTCGACCACCACCTCCACCCCCTCGACCACCACCTCCACCCCCTCGACCACCATCCCCGCTCCCCAAGCATCGACCACACCCTTCCCCACGGGAGACCCAAAACCCCAACCTCACGGGGTCAACCACGAACCCCCATCGAATGCCACGCGAGCGACCCGCG…
V3	-----------------------------------------------------------------------------ACTCTGGCGTACAACGGCTCGGCCCATGGCTCCTGCGACCCGAAACTGCTTCCGTCTTCGGCCCCGCGTCTGGCCCCGGCGAGCGTATACCAACCCGCCCCTAACCCGGCCTCCACCCCCTCGACCACCACCTCCACCCCCTCGACCACCATCCCCGCTCCC-CAAGCA--------------------------------------------------------------TCGACCACACCCTTCCCCACGGGAGACCCAAAACCCCAACCTCACGGGGTCAACCACGAACCCCCATCGAATGCCACGCGAGCGACCCGCG…
V4	---------------------------------------GCCTGTTTGTCCTGGGGATGGCCATAGCCGCCGAAGGGACTCTGGCGTACAACGGCTCGGCCCATGGCTCCTGCGACCCGAAACTGCTTCCGTATTCGGCCCCGCGTCTGGCCCCGGCGAGCGTATACCAACCCGCCCCTAACCCGGCCTCCACCCCCTCGACCACCACCTCCACCCCCTCGACCACCACCTC---------------------CACCCCCTCGACCACCA---------------------TCCCCGCTCCCCAAGCATCGACCACACCCTTCCCCACGGGAGACCCAAAACCCCAACCTCACGGGGTCAACCACGAACCCCCATCGAATGCCACGCGAGCGACCCGCG…
V5	-------------------------------------CAGCCTGTTTGTCCTGGGGATGGCCATAGCCGCCGAAGGGACTCTGGCGCACAACGGCTCGGCCCATGGCTCCTGCGACCCGAAACTGCTTCCGTCTTCGGCCCCGCGTCTGGCCCCGGCGAGCGTATACCAACCCGCCCCTAACCCGGCCTCCACCCCCTCGACCACCACCTCCACCCCCTCGACCACCACCTCCACCCCCTCGACCACCACCTCCACCCCCTCGACCACCA---------------------TCCCCGCTCCCCAAGCATCGACCACGCCCTTCCCCACGGGAGACCCAAAACCCCAACCTCACGGGGTCAACCACGAACCCCCATCGAATGCCACGCGAGCGACCCGCG…
V6	--------------------------------------------------------ATGGCCATAGCCGCCGAAGGTACTCTGGCGTACAACGGCTCGGCCCATGGCTCCTGCGACCCGAAACTGCTTCCGTCTTCGGCCCCGCGTCTGGCCCCGGCGAGCGTATACCAACCCGCCCCTAACCCGGCCTCCACCCCCTCGACCACCACCTCCACCCCCTCGACCACCATCCCCGCTCCC-CAAGCA--------------------------------------------------------------TCGACCACACCCTTCCCCACGGGAGACCCAAAACCCCAACCTCACGGGGTCAACCACGAACCCCCATCGAATGCCACGCGAGCGACCCGCG…
V7	------------------------------------------TGTTTGTCCTGGGGATGGCCATAGCCGCCCAAGGTACTCTGGCGTACAACGGCTCGGCCCATGGCTCCTGCGACCCGAAACTGCTTCCGTCTTCGGCCCCGCGTCTGGCCCCGGCGAGCGTATACCAACCCGCCCCTAACCCGGCCTCCACCCCCTCGACCACCACCTCCACCCCCTCGACCACCACCTC---------------------CACCCCCTCGACCACCA---------------------TCTCCGCTCCCCAAGCATCGACCACACCCTTCCCCACGGGAGACCCAAAACCCCAACCTCACGGGGTCAACCACGAACCCCCATCGAATGCCACGCGAGCGACCCGCG…
V8	-----------------------------------------------------------------------------ACTCTGGCGTACAACGGCTCGGCCCATGGCTCCTGCGACCCGAAACTGCTTCCGTCTTCGGCCCCGCGTCTGGCCCCGGCGAGCGTATACCAACCCGCCCCTAACCCGGCCTCCACCCCCTCGACCACCACCTCCACCCCCTCGACCACCA---------------------TCCCCGCTCCCC------------------------------------------AAGCATCGACCACACCCTTCCCCACGGGAGACCCAAAACCCCAACCTCACGGGGTCAACCACGAACCCCCATCGAATGCCACGCGAGCGACCCGCG…
V9	--------------------------------------------------------ATGGCCATAGCCGCCCAAGGTACTCTGGCGTA-AACGGCTCGGCCCATGGCTCCTGCGACCCGAAACTGCTTCCGTCTTCGGCCCCGCGTCTGGCCCCGGCGAGCGTATACCAACCCGCCCCTAACCCGGCCTCCACCCCCTCAACCACCACCTCCACCCCCTCGACCACCATCTC---------------------------------------------------------------CGCTCCCCAAGCATCGACCACACCCTTCCCCACGGGAGACCCAAAACCCCAACCTCACGGGGTCAACCACGAACCCCCATCGAATGCCACGCGAGCGACCCGCG…
V10	---------------------------------------GCCTGTTTGTCCTGGGGATGGCCATAGCCGCCGAAGGGACTCTGGCGTACAACGGCTCGGCCCATGGCTCCTGCGACCCGAAACTGCTTCCGTCTTCGGCCCCGCGTCTGGCCCCGGCGAGCGTATACCAACCCGCCCCTAACCCGGCCTCCACCCCCTCGACCACCACCTCCACCCCCTCGACCACCACCTCCACCCCCTCGACCACCACCTCCACCCCCTCGACCACCA---------------------TCCCCGCTCCCCAAGCATCGACCACGCCCTTCCCCACGGGAGACCCAAAACCCCAACCTCACGGGGTCGACCACGAACCCCCATCGAATGCCACGCGAGCGACCCGCG…
V11	----------------------------------------------------GGGGATGGCCATAGCCGCCGAAGGGACTCTGGCGTACAACGGCTCGGCCCATGGCTCCTGCGACCCGAAACTGCTTCCGTCTTCGGCCCCGCGTCTGGCCCCGGCGAGCGTATACCAACCCGCCCCTAACCCGGCCTTCACCCCCTCAACCACCACCTCCACCCCCTCGACCACCACCTCCACCCCCTCGACCACCATCCCCGCTCCCC------------------------------------------AAGCATCGACCACGCCCTTCCCCACGGGAGACCCAAAACCCCAACCTCCCGGGGTCAACCACGAACCCCCAGCTAATGCCACGCGAGCGACCCGCG…
V12	----------------------------------------------------GGGGATGGCCATAGCCGCCGAAGGTACTCTGGCGTACAACGGCTCGGCCCATGGCTCCTGCGACCCGAAACTGCTTCCGTCTTCGGCCCCGCGTCTGGCCCCGGCGAGCGTATACCAACCCGCCCCTAACCCGGCCTCCACCCCCTCGACCACCACCTCCACCCCCTCGACCACCACCTCCACCCCCTCGACCACCATCCCCGCTCCCC------------------------------------------AAGCATCGACCACACCCTTCCCCACGGGAGACCCAAAACCCCAACCTCACGGGGTCAACCACGAACCCCCATCGAATGCCACGCGAGCGACCCGCG…
V13	---------------------------------------GCCTGTTTGTCCTGGGGATGGCCATAGCCGCCGAAGGTACTCTGGCGTACAACGGCTCGGCCCATGGCTCCTGCGACCCGAAACTGCTTCCGTCTTCGGCCCCGCGTCTGGCCCCGGCGAGCGTATACCAACCCGCCCCTAACCCGGCCTCCACCCCCTCGACCACCACCTCCACCCCCTCGACCACCATCCCCGCTCCC-CAAGCA--------------------------------------------------------------TCGACCACACCCTTCCCCACGGGAGACCCAAAACCCCAACCTCACGGGGTCAACCACGAACCCCCATCGAATGCCACGCGAGCGACCCGCG…
V14	---------------------------------------GCCTGTTTGTCCTGGGGATGGCCATAGCCGCCGAAGGGACTCTGGCGTACAACGGCTCGGCCCATGGCTCCTGCGACCCGAAACTGCTTCCGTATTCGGCCCCGCGTCTGGCCCCGGCGAGCGTATACCAACCCGCCCCTAACCCGGCCTCCACCCCCTCGACCACCACCTCCACCCCCTCGACCACCACCTCCACCCCCTCGACCACCATCCCCGCTCCCC------------------------------------------AAGCATCGACCACACCCTTCCCCACGGGAGACCCAAAACCCCAACCTCACGGGGTCAACCACGAACCCCCATCGAATGCCACGCGAGCGACCCGCG…
V15	----------------------------------------------------GGGGATGGCCATAGCCGCCGAAGGTACTCTGGCGTACAACGGCTCGGCCCATGGCTCCTGCGACCCGAAACTGCTTCCGTCTTCGGCCCCGCGTCTGGCCCCGGCGAGCGTATACCAACCCGCCCCTAACCCGGCCTCCACCCCCTCGACCACCACCTCCACCCCCTCG---------------------ACCACCATCCCCGCTCCCC------------------------------------------AAGCATCGACCACACCCTTCCCCACGGGAGACCCAAAACCCCAACCTCACGGGGTCAACCACGAACCCCCATCGAATGCCACGCGAGCGACCCGCG…
V16	---------------------------------------GCCTGTTTGTCCTGGGGATGGCCATAGCCGCCGAAGGTACTCTGGCGTACAACGGCTCGGCCCATGGCTCCTGCGACCCGAAACTGCTTCCGTCTTCGGCCCCGCGTCTGGCCCCGGCGAGCGTATACCAACCCGCCCCTAACCCGGCCTCCACCCCCTCGACCACCACCTCCACCCCCTCGACCACCATCCCCGCTCCC-CAAGCA--------------------------------------------------------------TCGACCACACCCTTCCCCACGGGAGACCCAAAACCCCAACCTCACGGGGTCAACCACGAACCCCCATCGAATGCCACGCGAGCGACCCGCG…
V17	----------------------------------------------------GGGGATGGCCATAGCCGCCGAAGGTACTCTGGCGTACAACGGCTCGGCCCATGGCTCCTGCGACCCGAAACTGCTTCCGTCTTCGGCCCCGCGTCTGGCCCCGGCGAGCGTATACCAACCCGCCCCTAACCCGGCCTCCACCCCCTCGACCACCACCTCCACCCCCTCGACCACCACCTC---------------------CACCCCCTCGACCACCA---------------------TCCCCGCTCCCCAAGCATCGACCACACCCTTCCCCACGGGAGACCCAAAACCCCAACCTCACGGGGTCAACCACGAACCCCCATCGAATGCCACGCGAGCGACCCGCG…
V18	---------------------------------------GCCTGTTTGTCCTGGGGATGGCCATAGCCGCCGAAGGTACTCTGGCGTACAACGGCTCGGCCCATGGCTCCTGCGACCCGAAACTGCTTCCGTCTTCGGCCCCGCGTCTGGCCCCGGCGAGCGTATACCAACCCGCCCCTAACCCGGCCTCCACCCCCTCGACCACCACCTCCACCCCCTCGACCACCATCCCCGCTCCC-CAAGCA--------------------------------------------------------------TCGACCACACCCTTCCCCACGGGAGACCCAAAACCCCAACCTCACGGGGTCAACCACGAACCCCCATCGAATGCCACGCGAGCGACCCGCG…
V19	------------------------------------------------------GGATGGCCATAGCCGCCGAAGGTACTCTGGCGTACAACGGCTCGGCCCATGGCTCCTGCGACCCGAAACTGCTTCCGTCTTCGGCCCCGCGTCTGGCCCCGGCGAGCGTATACCAACCCGCCCCTAACCCGGCCTCCACCCCCTCGACCACCACCTCCACCCCCTCGACCACCA---------------------TCCCCGCTCCCC------------------------------------------AAGCATCGACCACACCCTTCCCCACGGGAGACCCAAAACCCCAACCTCACGGGGTCAACCACGAACCCCCATCGAATGCCACGCGAGCGACCCGCG…
V20	-----------------------------------------------------------------------------------------AACGGCTCGGCCCATGGCTCCTGCGACCCGAAACTGCTTCCGTCTTCGGCCCCGCGTCTGGCCCCGGCGAGCGTATACCAACCCGCCCCTAACCCGGCCTCCACCCCCTCGACCACCACCTCCACCCCCTCGACCACCA---------------------TCCCCGCTCCCC------------------------------------------AAGCATCGACCACACCCTTCCCCACGGGAGACCCAAAACCCCAACCTCACGGGGTCAACCACGAACCCCCATCGAATGCCACGCGAGCGACCCGCG…
V21	---------------------------------------GCCTGTTTGTCCTGGGGATGGCCATAGCCGCCGAAGGTACTCTGGCGTACAACGGCTCGGCCCATGGCTCCTGCGACCCGAAACTGCTTCCGTCTTCGGCCCCGCGTCTGGCCCCGGCGAGCGTATACCAACCCGCCCCTAACCCGGCCTCCACCCCCTCGACCACCACCTCCACCCCCTCGACCACCACCTCCACCCCCTCGACCACCATCCCCGCTCCCC------------------------------------------AAGCATCGACCACACCCTTCCCCACGGGAGACCCAAAACCCCAACCTCACGGGGTCAACCACGAACCCCCATCGAATGCCACGCGAGCGACCCGCG…
V22	----------------------------------------------------GGGGATGGCCATAGCCGCCGAAGGGACTCTGGCGTACAACGGCTCGGCCCATGGCTCCTGCGACCCGAAACTGCTTCCGTATTCGGCCCCGCGTCTGGCCCCGGCGAGCGTATACCAACCCGCCCCTAACCCGGCCTCCACCCCCTCGACCACCACCTCCACCCCCTCGACCACCACCTCCACCCCCTCGACCACCACCTCCACCCCCTCGACCACCA---------------------TCCCCGCTCCCCAAGCATCGACCACACCCTTCCCCATGGGAGACCCAAAACCCCAACCTCACGGGGTCAACCACGAACCCCCATCGAATGCCACGCGAGCGACCCGCG…
V23	---------------------------------------GCCTGTTTGTCCTGGGGATGGCCATAGCCGCCGAAGGGACTCTGGCGTACAACGGCTCGGCCCATGGCTCCTGCGACCCGAAACTGCTTCCGTATTCGGCCCCGCGTCTGGCCCCGGCGAGCGTATACCAACCCGCCCCTAACCCGGCCTCCACCCCCTCGACCACCACCTCCACCCCCTCGACCACCACCTCCACCCCCTCGACCACCACCTCCACCCCCTCGACCACCA---------------------TCCCCGCTCCCCAAGCATCGACCACACCCTTCCCCACGGGAGACCCAAAACCCCAACCTCACGGGGTCAACCACGAACCCCCATCGAATGCCACGCGAGCGACCCGCG…
V24	------------------------------------------------------------------------AAGGTACTCTGGCGTACAACGGCTCGGCCCATGGCTCCTGCGACCCGAAACTGCTTCCGTCTTCGGCCCCGCGTCTGGCCCCGGCGAGCGTATACCAACCCGCCCCTAACCCGGCCTCCACCCCCTCGACCACCACCTCCACCCCCTCGACCACCA---------------------TCCCCGCTCCCC------------------------------------------AAGCATCGACCACACCCTTCCCCACGGGAGACCCAAAACCCCAACCTCACGGGGTCAACCACGAACCCCCATCGAATGCCACGCGAGCGACCCGCG…
V25	---------------------------------------GCCTGTTTGTCCTGGGGATGGCCATAGCCGCCGAAGGGACTCTGGCGTACAACGGCTCGGCCTATGGCTCCTGCGACCCGAAACTGCTTCCGTCTTCGGCCCCGCGTCTGGCCCCGGCGAGCGTATACCAACCCGCCCCTAACCAGGCCTCCACCCCCTCGACCACCACCTCCACCCCCTCGACCACCATCCCCGCTCCCTCGACCACCATCCCCGCTCCCC------------------------------------------AAGCATCGACCACGCCCTTCCCCACGGGAGATCCAAAACCACAACCTCCCGGGGTCAACCACGAACCCCCATCTAATGCCACGCGAGCGACCCGCG…
V26	------------------------------------------------------------------------AAGGTACTCTGGCGTACAACGGCTCGGCCCATGGCTCCTGCGACCCGAAACTGCTTCCGTCTTCGGCCCCGCGTCTGGCCCCGGCGAGCGTATACCAACCCGCCCCTAACCCGGCCTCCACCCCCTCGACCACCACCTC---------------------CACCCCCTCGACCACCATCCCCGCTCCCC------------------------------------------AAGCATCGACCACACCCTTCCCCACGGGAGACCCAAAACCCCAACCTCACGGGGTCAACCACGAACCCCCATCGAATGCCACGCGAGCGACCCGCG…
V27	--------------TGGGTCGGTGACGCGCCAAACGCCAGCCTGTTTGTCCTGGGGATGGCCATAGCCGCCGAAGGGACTCTGGCGTACAACGGCTCGGCCTATGGCTCCTGCGACCCGAAACTGCTTCCGTCTTCGGCCCCGCGTCTGGCCCCGGCGAGCGTATACCAACCCGCCCCTAACCAGGCCTCCACCCCCTCGACCACCACCTCCACCCCCTCGACCACCATCCCCGCTCCC-CAAGCA--------------------------------------------------------------TCGACCACGCCCTTCCCCACGGGAGATCCAAAACCACAACCTCCCGGGGTCAACCACGAACCCCCATCTAATGCCACGCGAGCGACCCGCG…
V28	------------------------------------------------------------------------AAGGTACTCTGGCGTACAACGGCTCGGCCCATGGCTCCTGCGACCCGAAACTGCTTCCGTCTTCGGCCCCGCGTCTGGCCCCGGCGAGCGTATACCAACCCGCCCCTAACCCGGCCTCCACCCCCTCGACCACCACCTCCACCCCCTCGACCACCA---------------------TCCCCGCTCCCC------------------------------------------AAGCATCGACCACACCCTTCCCCACGGGAGACCCAAAACCCCAACCTCACGGGGTCAACCACGAACCCCCATCGAATGCCACGCGAGCGACCCGCG…
V29	------------------------------------------------------------------------AAGGTACTCTGGCGTACAACGGCTCGGCCCATGGCTCCTGCGACCCGAAACTGCTTCCGTCTTCGGCCCCGCGTCTGGCCCCGGCGAGCGTATACCAACCCGCCCCTAACCCGGCCTCCACCCCCTCGACCACCACCTC---------------------CACCCCCTCGACCACCATCCCCGCTCCCC------------------------------------------AAGCATCGACCACACCCTTCCCCACGGGAGACCCAAAACCCCAACCTCACGGGGTCAACCACGAACCCCCATCGAATGCCACGCGAGCGACCCGCG…
V30	---------------------------------------GCCTGTTTGTCCTGGGGATGGCCATAGCCGCCGAAGGTACTCTGGCGTACAACGGCTCGGCCCATGGCTCCTGCGACCCGAAACTGCTTCCGTCTTCGGCCCCGCGTCTGGCCCCGGCGAGCGTATACCAACCCGCCCCTAACCCGGCCTCCACCCCCTCGACCACCACCTCCACCCCCTCGACCACCACCTCCACCCCCTCGACCACCACCTCCACCCCCTCGACCACCA---------------------TCCCCGCTCCCCAAGCATCGACCACACCCTTCCCCACGGGAGACCCAAAACCCCAACCTCACGGGGTCAACCACGAACCCCCATCGAATGCCACGCGAGCGACCCGCG…
V31	------------------------------------------------------------------------AAGGTACTCTGGCGTACAACGGCTCGGCCCATGGCTCCTGCGACCCGAAACTGCTTCCGTCTTCGGCCCCGCGTCTGGCCCCGGCGAGCGTATACCAACCCGCCCCTAACCCGGCCTCCACCCCCTCGACCACCACCTC---------------------CACCCCCTCGACCACCATCCCCGCTCCCC------------------------------------------AAGCATCGACCACACCCTTCCCCACGGGAGACCCAAAACCCCAACCTCACGGGGTCAACCACGAACCCCCATCGAATGCCACGCGAGCGACCCGCG…
V32	---------------------------------------GCCTGTTTGTCCTGGGGATGGCCATAGCCGCCGAAGGGACTCTGGCGTACAACGGCTCGGCCCATGGCTCCTGCGACCCGAAACTGCTTCCGTATTCGGCCCCGCGTCTGGCCCCGGCGAGCGTATACCAACCCGCCCCTAACCCGGCCTCCACCCCCTCGACCACCACCTCCACCCCCTCGACCACCACCTCCACCCCCTCGACCACCACCTCCACCCCC------------------------------------------------TCGACCACGCCCTTCCCCACGGGAGACCCAAAACCACAACCTCCCGGGGTCAACCACGAACCCCCATCTAATGCCACGCGAGCGACCCGCG…
V33	----------------------------------------CCTGTTTGTCCTGGGGATGGCCATAGCCGCCGAAGGGACTCTGGCGTACAACGGCTCGGCCCATGGCTCCTGCGACCCGAAACTGCTTCCGTATTCGGCCCCGCGTCTGGCCCCGGCGAGCGTATACCAACCCGCCCCTAACCCGGCCTCCACCCCCTCGACCACCACCTCCACCCCCTCGACCACCACCTCCACCCCCTCGACCACCACCTCCACCCCCTCGACCACCA---------------------TCCCCGCTCCCCAAGCATCGACCACACCCTTCCCCACGGGAGACCCAAAACCCCAACCTCACGGGGTCAACCACGAACCCCCATCGAATGCCACGCGAGCGACCCGCG…
V34	----------------------------------------CCTGTTTGTCCTGGGGATGGCCATAGCCGCCGAAGGTACTCTGGCGTACAACGGCTCGGCCCATGGCTCCTGCGACCCGAAACTGCTTCCGTCTTCGGCCCCGCGTCTGGCCCCGGCGAGCGTATACCAACCCGCCCCTAACCCGGCCTCCACCCCCTCGACCACCACCTCCACCCCCTCGACCACCACCTCCACCCCCTCGACCACCATCCCCGCTCCCC------------------------------------------AAGCATCGACCACACCCTTCCCCACGGGAGACCCAAAACCCCAACCTCACGGGGTCAACCACGAACCCCCATCGAATGCCACGCGAGCGACCCGCG…
V35	----------------------------------------------------------GGCCATAGCCGCCGAAGGTACTCTGGCGTACAACGGCTCGGCCCATGGCTCCTGCGACCCGAAACTGCTTCCGTCTTCGGCCCCGCGTCTGGCCCCGGCGAGCGTATACCAACCCGCCCCTAACCCGGCCTCCACCCCCTCGACCACCACCTCCACCCCCTCGACCACCATCCCCGCTCCC-CAAGCA--------------------------------------------------------------TCGACCACACCCTTCCCCACGGGAGACCCAAAACCCCAACCTCACGGGGTCAACCACGAACCCCCATCGAATGCCACGCGAGCGACCCGCG…
V36	----------------------------------------------------GGGGATGGCCATAGCCGCCGAAGGGACTCTGGCGTACAACGGCTCGGCCCATGGCTCCTGCGACCCGAAACTGCTTCCGTCTTCGGCCCCGCGTCTGGCCCCGGCGAGCGTATACCAACCCGCCCCTAACCCGGCCTCCACCCCCTCGACCACCACCTCCACCCCCTCGACCACCACCTCCACCCCCTCGACCACCATCCCCGCTCCCC------------------------------------------AAGCATCGACCACGCCCTTCCCCACGGGAGACCCAAAACCCCAACCTCACGGGGTCAACCACGAACCCCCATCGAATGCCACGCGAGCGACCCGCG…
V1	---------------------------------------GCCTGTTTGTCCTGGGGATGGCCATAGCCGCCGAAGGTACTCTGGCGTACAACGGCTCGGCCCATGGCTCCTGCGACCCGAAACTGCTTCCGTCTTCGGCCCCGCGTCTGGCCCCGGCGAGCGTATACCAACCCGCCCCTAACCCGGCCTCCACCCCCTCGACCACCACCTCCACCCCCTCGACCACCACCTCCACCCCCTCGACCACCATCCCCGCTCCCC------------------------------------------AAGCATCGACCACACCCTTCCCCACGGGAGACCCAAAACCCCAACCTCACGGGGTCAACCACGAACCCCCATCGAATGCCACGCGAGCGACCCGCG…
H12118	ACGTGTTACGCGTATGGGTCGGGGACGCACCAAACGCCAGCCTGTTTGTCCTGGGGATGGCCATAGCCGCCGAAGGGACTCTGGCGTACAACGGCTCGGCCCATGGCTCCTGCGACCCGAAACTGCTTCCGTCTTCGGCCCCGCGTCTGGCCCCGGCGAGCGTATACCAACCCGCCCCTAACCCGGCCTCCACCCCCTCGACCACCACCTCCACCCCCTCGACCACCACCTCCACCCCCTCGACCACCACCTCCACCCCCTCGACCACCA---------------------TCCCCGCTCCCCAAGCATCGACCACGCCCTTCCCCACGGGAGACCCAAAACCCCAACCTCACGGGGTCAACCACGAACCCCCATCGAATGCCACGCGAGCGACCCGCG…
H15119	ACGTGTTACGCGTATGGGTCGGGGACGCACCAAACGCCAGCCTGTTTGTCCTGGGGATGGCCATAGCCGCCGAAGGGACTCTGGCGTACAACGGCTCGGCCCATGGCTCCTGCGACCCGAAACTGCTTCCGTATTCGGCCCCGCGTCTGGCCCCGGCGAGCGTATACCAACCCGCCCCTAACCCGGCCTCCACCCCCTCGACCACCACCTCCACCCCCTCGACCACCACCTCCACCCCCTCGACCACCACCTCCACCCCCTCGACCACCACCTCCACCCCCTCGACCACCATCCCCGCTCCCCAAGCATCGACCACACCCTTCCCCACGGGAGACCCAAAACCCCAACCTCACGGGGTCAACCACGAACCCCCATCGAATGCCACGCGAGCGACCCGCG…
H1312	ACGTGTTACGCGTATGGGTCGGGGACGCACCAAACGCCAGCCTGTTTGTCCTGGGGATGGCCATAGCCGCCGAAGGGACTCTGGCGTACAACGGCTCGGCCCATGGCTCCTGCGACCCGAAACTGCTTCCGTATTCGGCCCCGCGTCTGGCCCCGGCGAGCGTATACCAACCCGCCCCTAACCCGGCCTCCACCCCCTCGACCACCACCTCCACCCCCTCGACCACCACCTCCACCCCCTCGACCACCACCTCCACCCCCTCGACCACCA---------------------TCCCCGCTCCCCAAGCATCGACCACACCCTTCCCCATGGGAGACCCAAAACCCCAACCTCACGGGGTCAACCACGAACCCCCATCGAATGCCACGCGAGCGACCCGCG…
H1412	ACGTGTTACGCGTATGGGTCGGGGACGCACCAAACGCCAGCCTGTTTGTCCTGGGGATGGCCATAGCCGCCGAAGGTACTCTGGCGTACAACGGCTCGGCCCATGGCTCCTGCGACCCGAAACTGCTTCCGTCTTCGGCCCCGCGTCTGGCCCCGGCGAGCGTATACCAACCCGCCCCTAACCCGGCCTCCACCCCCTCGACCACCACCTCCACCCCCTCGACCACCACCTCCACCCCCTCGACCACCACCTCCACCCCCTCGACCACCACCTCCACCCCCTCGACCACCATCCCCGCTCCCCAAGCATCGACCACACCCTTCCCCACGGGAGACCCAAAACCCCAACCTCACGGGGTCAACCACGAACCCCCATCGAATGCCACGCGAGCGACCCGCG…
H12113	ACGTGTTACGCGTATGGGTCGGGGACGCACCAAACGCCAGCCTGTTTGTCCTGGGGATGGCCATAGCCGCCGAAGGTACTCTGGCGTACAACGGCTCGGCCCATGGCTCCTGCGACCCGAAACTGCTTCCGTCTTCGGCCCCGCGTCTGGCCCCGGCGAGCGTATACCAACCCGCCCCTAACCCGGCCTCCACCCCCTCGACCACCACCTCCACCCCCTCGACCACCATCCCCGCTCCC-CAAGCA--------------------------------------------------------------TCGACCACACCCTTCCCCACGGGAGACCCAAAACCCCAACCTCACGGGGTCAACCACGAACCCCCATCGAATGCCACGCGAGCGACCCGCG…
H12114	ACGTGTTACGCGTATGGGTCGGGGACGCACCAAACGCCAGCCTGTTTGTCCTGGGGATGGCCATAGCCGCCGAAGGGACTCTGGCGTACAACGGCTCGGCCCATGGCTCCTGCGACCCGAAACTGCTTCCGTCTTCGGCCCCGCGTCTGGCCCCGGCGAGCGTATACCAACCCGCCCCTAACCCGGCCTCCACCCCCTCGACCACCACCTCCACCCCCTCGACCACCACCTCCACCCCCTCGACCACCATCCCCGCTCCCC------------------------------------------AAGCATCGACCACGCCCTTCCCCACGGGAGACCCAAAACCCCAACCTCACGGGGTCAACCACGAACCCCCATCGAATGCCACGCGAGCGACCCGCG…
H12117	ACGTGTTACGCGTATGGGTCGGGGACGCACCAAACGCCAGCCTGTTTGTCCTGGGGATGGCCATAGCCGCCGAAGGTACTCTGGCGTACAACGGCTCGGCCCATGGCTCCTGCGACCCGAAACTGCTTCCGTCTTCGGCCCCGCGTCTGGCCCCGGCGAGCGTATACCAACCCGCCCCTAACCCGGCCTCCACCCCCTCGACCACCACCTCCACCCCCTCGACCACCATCCCCGCTCCC-CAAGCA--------------------------------------------------------------TCGACCACACCCTTCCCCACGGGAGACCCAAAACCCCAACCTCACGGGGTCAACCACGAACCCCCATCGAATGCCACGCGAGCGACCCGCG…
H1211	ACGTGTTACGCGTATGGGTCGGGGACGCACCAAACGCCAGCCTGTTTGTCCTGGGGATGGCCATAGCCGCCGAAGGGACTCTGGCGTACAACGGCTCGGCCCATGGCTCCTGCGACCCGAAACTGCTTCCGTCTTCGGCCCCGCGTCTGGCCCCGGCGAGCGTATACCAACCCGCCCCTAACCCGGCCTTCACCCCCTCAACCACCACCTCCACCCCCTCGACCACCACCTCCACCCCCTCGACCACCATCCCCGCTCCCC------------------------------------------AAGCATCGACCACGCCCTTCCCCACGGGAGACCCAAAACCCCAACCTCCCGGGGTCAACCACGAACCCCCAGCTAATGCCACGCGAGCGACCCGCG…
H1215	ACGTGTTACGCGTATGGGTCGGGGACGCACCAAACGCCAGCCTGTTTGTCCTGGGGATGGCCATAGCCGCCGAAGGTACTCTGGCGTACAACGGCTCGGCCCATGGCTCCTGCGACCCGAAACTGCTTCCGTCTTCGGCCCCGCGTCTGGCCCCGGCGAGCGTATACCAACCCGCCCCTAACCCGGCCTCCACCCCCTCGACCACCACCTCCACCCCCTCGACCACCACCTCCACCCCCTCGACCACCATCCCCGCTCCCC------------------------------------------AAGCATCGACCACACCCTTCCCCACGGGAGACCCAAAACCCCAACCTCACGGGGTCAACCACGAACCCCCATCGAATGCCACGCGAGCGACCCGCG…
H1311	ACGTGTTACGCGTATGGGTCGGGGACGCACCAAACGCCAGCCTGTTTGTCCTGGGGATGGCCATAGCCGCCCAAGGTACTCTGGCGTACAACGGCTCGGCCCATGGCTCCTGCGACCCGAAACTGCTTCCGTCTTCGGCCCCGCGTCTGGCCCCGGCGAGCGTATACCAACCCGCCCCTAACCCGGCCTCCACCCCCTCGACCACCACCTCCACCCCCTCGACCACCACCTCCACCCCCTCGACCACCACCTCCACCCCCTCGACCACCA---------------------TCCCCGCTCCCCAAGCATCGACCACACCCTTCCCCACGGGAGACCCAAAACCCCAACCTCACGGGGTCAACCACGAACCCCCATCGAATGCCACGCGAGCGACCCGCG…
